# Supplementary material for: Genetic Association Analysis of Copy Number Variations for Meat Quality in Beef Cattle
Source: MDPI journal article supplement (doi:10.3390/foods12213986), 2023-10-31
Supplement: s1 [file s1]

Supplementary Material

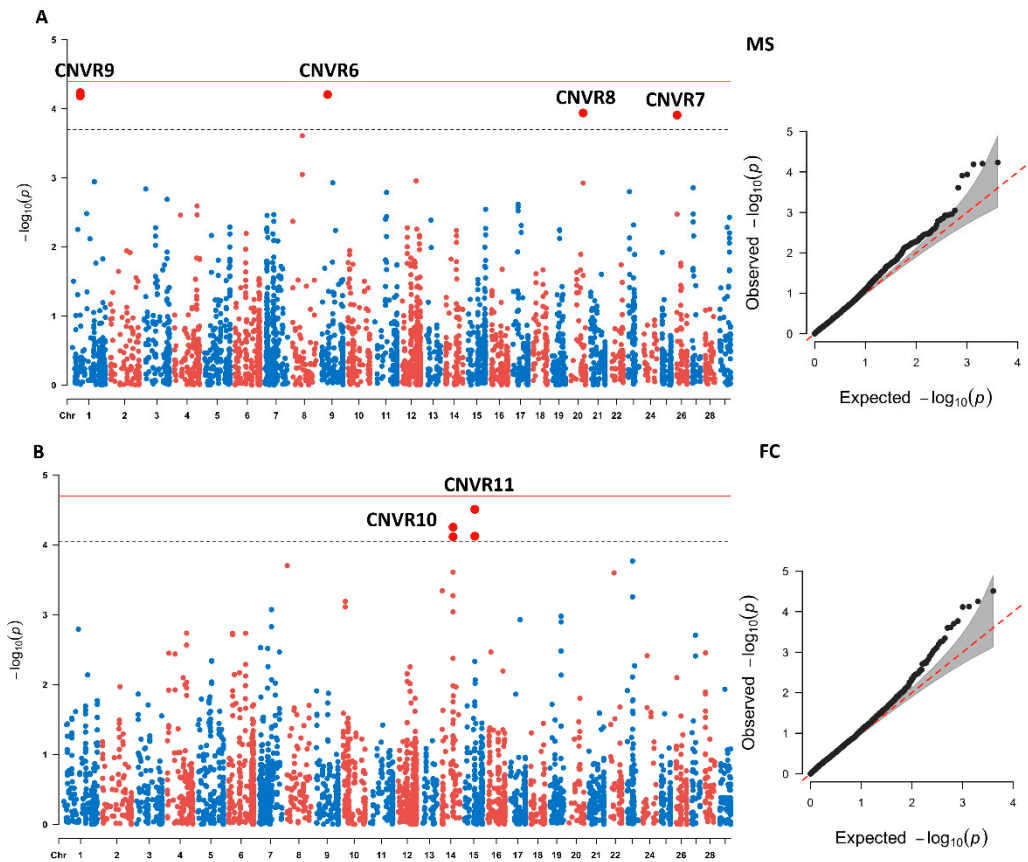

**Figure S1.** Manhattan plots showing the  $-\log_{10} p$ -values for CNV-based GWAS. (A) Genome-wide association results for CNV segments for MS. (B) Genome-wide association results for CNV segments for FC. The red and black lines represent the genome-wide significance thresholds at  $p$  value =  $4 \times 10^{-5}$  and  $2 \times 10^{-4}$ , respectively.

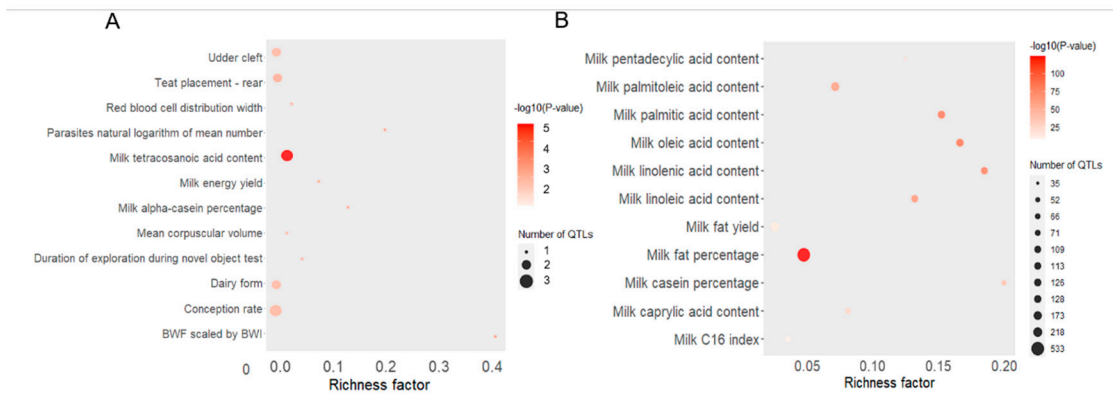

**Figure S2.** QTL enrichment results based on genes identified in CNV-based GWAS. (A) QTL enrichment analyses of significant CNVs for BFT. The richness factor was obtained using the ratio of the number of QTLs annotated in the candidate regions and the total number of each QTL. (B) QTL enrichment analyses of significant CNVs for MS.

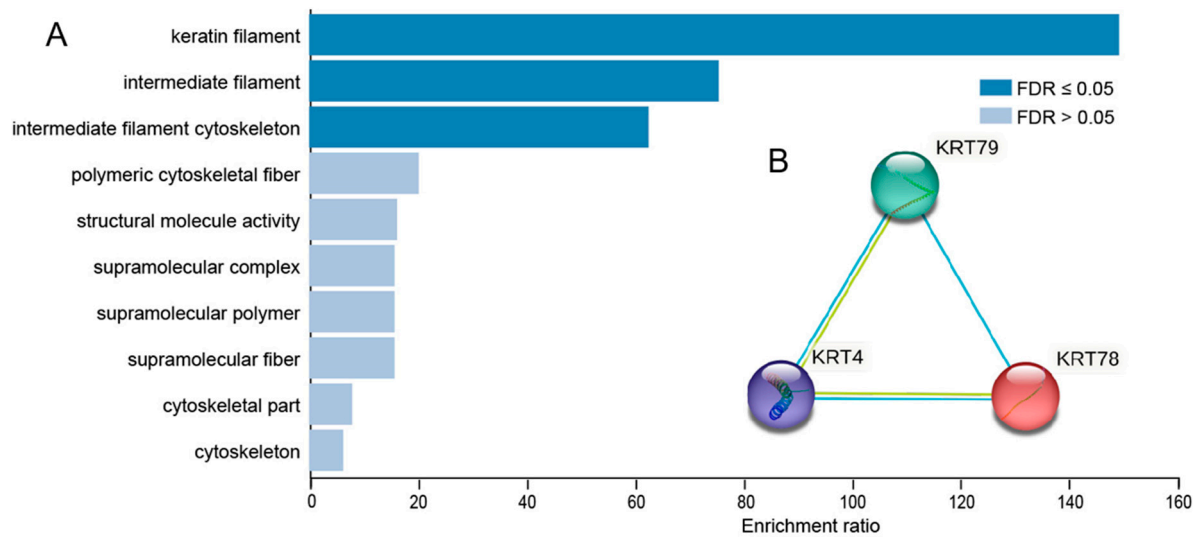

**Figure S3.** Functional enrichment of candidate genes obtained through CNV analysis. **(A)** Enrichment of GO terms associated with genes within CNVR1 ( $FDR < 0.05$ ). **(B)** STRING enriched pathways and protein domains for CNVRs and candidate genes related to MC.

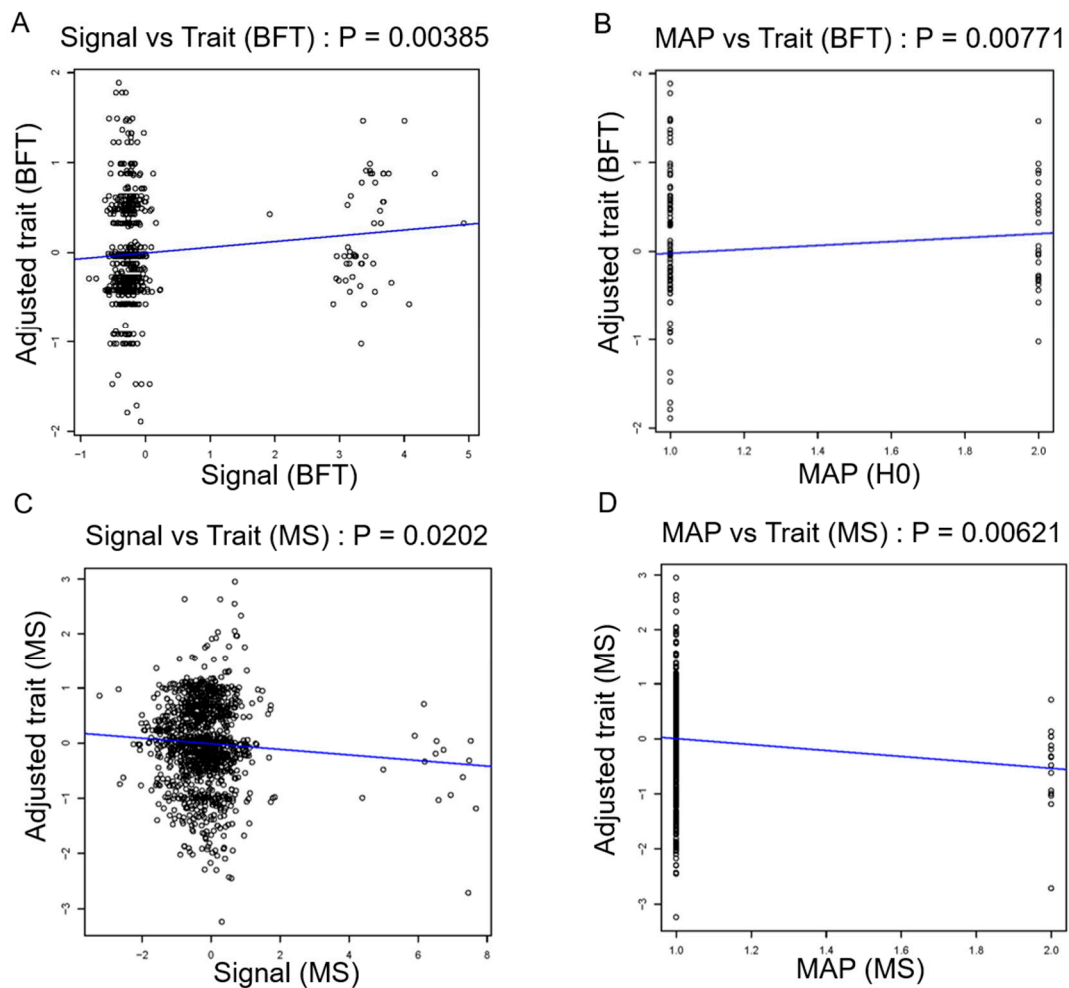

**Figure S4.** Region association of BFT and MS for CNV segments at 5 Mb on BTA29 and 4 Mb on BTA26. **(A)** The adjusted traits against signals (LogRR) for CNV segments related to BFT at 5 Mb on BTA29. **(B)** The adjusted traits against copy number states (MAP) curated for CNV segments on BTA29 related to BFT using mixture model assignment. **(C)** The adjusted traits against signals (LogRR) for CNV segments related to MS at 4 Mb on BTA26. **(D)** The adjusted

traits against copy number states (MAP) estimated for CNV segments on BTA26 related to MS using mixture model assignment.

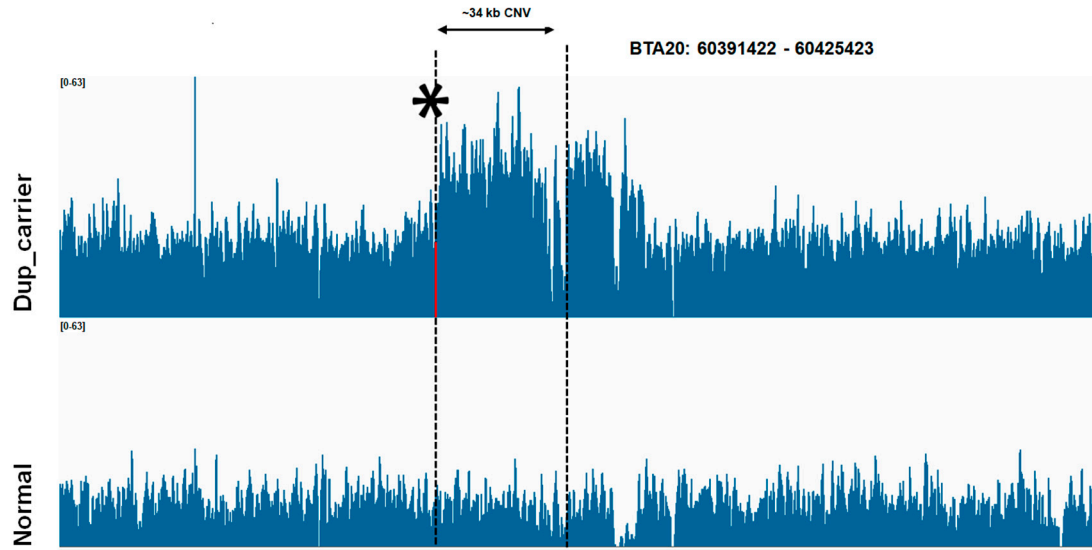

**Figure S5.** Identification of the 34 kb duplication (BTA20:60391422-60425423) based on WGS of a subject using the IGV program. The lead SNP (red) is marked with a black asterisk.

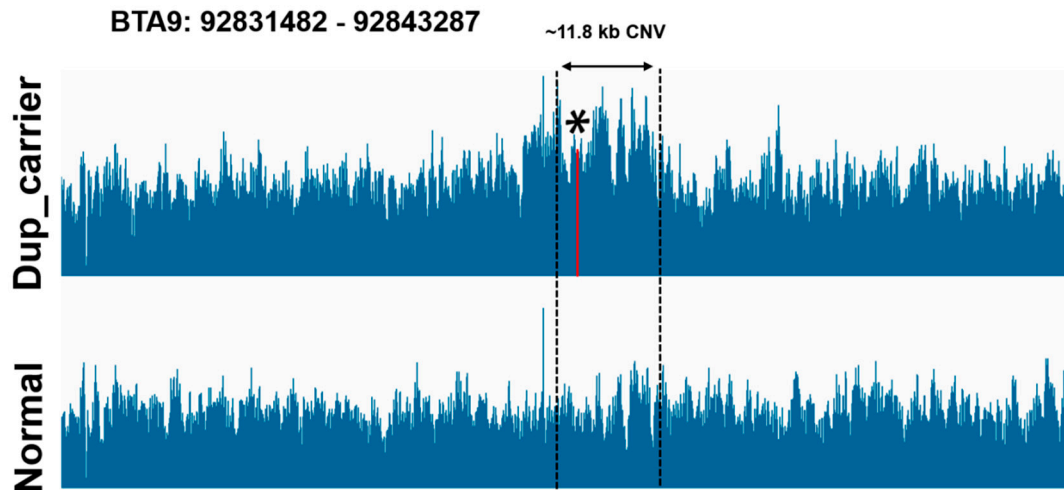

**Figure S6.** Identification of an 11.8 kb duplication (BTA9:92831482-92843287) based on WGS of a subject using the IGV program. The lead SNP (red) is marked with a black asterisk.

**Table S1.** Descriptive statistics of six meat quality traits.

| Trait | Number | Mean  | Min   | Max    | SD      | Heritability |
|-------|--------|-------|-------|--------|---------|--------------|
| MC    | 1248   | 5.896 | 1     | 7      | 1.056   | 0.132719     |
| FC    | 1193   | 1.733 | 1     | 5      | 0.744   | 0.397855     |
| PH    | 1211   | 5.62  | 4.51  | 7.16   | 0.363   | 0.012799     |
| MS    | 1253   | 5.084 | 1     | 6      | 0.97    | 0.167825     |
| REA   | 726    | 75.14 | 31.84 | 107.36 | 11.4805 | 0.182386     |
| BFT   | 783    | 2.519 | 0.9   | 5.84   | 0.881   | 0.188646     |

Note: Min: minimum; Max: maximum; SD: standard deviation.

**Table S2.** The GO and REAC enrichment analyses of gene mapped by CNV-based GWAS.

| Term id            | Term Name                          | Adjusted $p$ Value | $-\log_{10}$ of Adjusted $p$ Value | Effective Domain Size | Intersections      |
|--------------------|------------------------------------|--------------------|------------------------------------|-----------------------|--------------------|
| GO:0045095         | Keratin filament                   | 0.000181           | 3.7433576                          | 19665                 | KRT4, KRT78, KRT79 |
| GO:0005882         | Intermediate filament              | 0.000715           | 3.145567153                        | 19665                 | KRT4, KRT78, KRT79 |
| GO:0045111         | Intermediate filament cytoskeleton | 0.001273           | 2.895228625                        | 19665                 | KRT4, KRT78, KRT79 |
| GO:0099513         | Polymeric cytoskeletal fiber       | 0.03544            | 1.450506358                        | 19665                 | KRT4, KRT78, KRT79 |
| REAC:R-BTA-6805567 | Keratinization                     | 0.000612           | 3.213463001                        | 4908                  | KRT4, KRT78, KRT79 |
| REAC:R-BTA-1266738 | Developmental biology              | 0.005957           | 2.224978325                        | 4908                  | KRT4, KRT78, KRT79 |

Note: GO: Gene Ontology; REAC: Reactome.

**Table S3.** STRING enriched pathways and protein domains for CNV candidate genes related to MC.

| Term ID   | Term Description                              | FDR     | Matching Proteins ID                                             | Matching Proteins        |
|-----------|-----------------------------------------------|---------|------------------------------------------------------------------|--------------------------|
| KW-0403   | Intermediate filament                         | 0.00082 | ENSBTAP00000000815,<br>ENSBTAP00000016832,<br>ENSBTAP00000016839 | KRT78,<br>KRT4,<br>KRT79 |
| KW-0416   | Keratin                                       | 0.0289  | ENSBTAP00000000815,<br>ENSBTAP00000016839                        | KRT78,<br>KRT79          |
| IPR003054 | Keratin, type II                              | 0.0006  | ENSBTAP00000000815,<br>ENSBTAP00000016832,<br>ENSBTAP00000016839 | KRT78,<br>KRT4,<br>KRT79 |
| IPR032444 | Keratin type II head                          | 0.0006  | ENSBTAP00000016839                                               | KRT79                    |
| IPR018039 | Intermediate filament protein, conserved site | 0.0022  | ENSBTAP00000000815,<br>ENSBTAP00000016832,<br>ENSBTAP00000016839 | KRT78,<br>KRT4,<br>KRT79 |
| IPR039008 | Intermediate filament, rod domain             | 0.003   | ENSBTAP00000016839                                               | KRT79                    |

**Table S4.** Overlapped variants compared with CNVR datasets in cattle.

| CNV Segment | BTA | Location (bp)         | Length (kb) | Type        |
|-------------|-----|-----------------------|-------------|-------------|
| CNVR1       | 5   | 27,087,501-27,090,000 | 2.5         | Both        |
| CNVR2       | 29  | 5,172,501-5,175,000   | 2.5         | Duplication |
| CNVR2       | 29  | 5,181,501-5,184,000   | 2.5         | Both        |
| CNVR2       | 29  | 5,213,001-5,215,000   | 2.0         | Both        |
| CNVR2       | 29  | 5,239,001-5,242,500   | 3.5         | Duplication |
| CNVR2       | 29  | 5,246,501-5,249,000   | 2.5         | Duplication |
| CNVR2       | 29  | 5,259,001-5,261,000   | 2.0         | Both        |
| CNVR2       | 29  | 5,268,501-5,277,500   | 9.0         | Both        |
| CNVR8       | 20  | 60,405,501-60,410,000 | 4.5         | Duplication |
| CNVR11      | 15  | 47,407,001-47,441,500 | 34.5        | Both        |
